# Supplementary material for: Deep learning approach to describe and classify fungi microscopic images
Source: PubMed Central journal article supplement (PMC7326179; doi:10.1371/journal.pone.0234806), 2020-06-30
Supplement: pone.0234806.s001.pdf [file pone.0234806.s001.pdf]

# S1 Appendix

To make this paper self-contained, below, we recall definitions of Bag of Words [24] and Fisher Vector [25].

**Bag of Words.** Let  $\{X_i\}_{i=1}^N$  be the representations of  $N$  training images obtained from the last convolutional layer of CNN, where  $X_i = \{x_{i,j} \in \mathbb{R}^{c_n}\}_{j=1}^{w_n h_n}$ , while  $w_n, h_n$ , and  $c_n$  are dimensions of the  $n$ th CNN layer. The representations are consolidated  $X = X_1 \cup X_2 \cup \dots \cup X_N$ , and a codebook of size  $K$  is calculated using  $k$ -means clustering on  $X$ . Let  $\{\mu_k \in \mathbb{R}^{c_n}, k = 1, \dots, K\}$  denote the centers of the obtained clusters. Moreover, let us denote  $NN(x_{i,j})$  as the index of the cluster center nearest to  $x_{i,j}$ :

$$NN(x_{i,j}) = k : d(x_{i,j}, \mu_k) \leq d(x_{i,j}, \mu_l) \text{ for all } l \in \{1, \dots, w_n h_n\}.$$

The Bag of Words counts the number of points from  $X_i$ , which are closer to particular clusters:

$$BoW(X_i) = (card\{x_{i,j} \in X_i : NN(x_{i,j}) = k\})_{k=1, \dots, K}.$$

**Fisher Vector.** Similarly to Bag of Words, the Fisher Vector starts with consolidating the representations into  $X$ . Then,  $X$  is used to generate the Gaussian Mixture Model (GMM)  $\lambda = \{\pi_k, \mu_k, \Sigma_k, k = 1, \dots, K\}$ , where  $\pi_k, \mu_k$  and  $\Sigma_k$  denote the weight, mean vector and covariance matrix of  $k$ th Gaussian, and  $K$  is the number of Gaussians. Intuitively, the Fisher Vector characterizes a particular representation  $X_i$  with a gradient vector derived from GMM. More formally, let  $\mathcal{L}(X_i|\lambda) = \log p(X_i|\lambda)$  is the likelihood that point  $x_{i,j}$  was generated by the GMM (under the independence assumption):

$$\mathcal{L}(X_i|\lambda) = \log \prod_{x_{i,j} \in X_i} p(x_{i,j}|\lambda) = \sum_{x_{i,j} \in X_i} \log p(x_{i,j}|\lambda),$$

where:

$$p(x_{i,j}|\lambda) = \sum_{k=1}^K \pi_k p_k(x_{i,j}|\lambda).$$

Assuming that the covariance matrices are diagonal (for ease of calculation), the derivations  $\frac{\partial \mathcal{L}(X_i|\lambda)}{\partial \mu_k^d}$  and  $\frac{\partial \mathcal{L}(X_i|\lambda)}{\partial \sigma_k^d}$  (where  $\sigma_k^d = \text{diag}(\Sigma_k)$  and superscript  $d$  denotes the  $d$ th dimension of a vector) can be effectively computed as [25]:

$$\frac{\partial \mathcal{L}(X_i|\lambda)}{\partial \mu_k^d} = \sum_{x_{i,j} \in X_i} \gamma_k(x_{i,j}) \left[ \frac{x_{i,j}^d - \mu_k^d}{(\sigma_k^d)^2} \right],$$

$$\frac{\partial \mathcal{L}(X_i|\lambda)}{\partial \sigma_k^d} = \sum_{x_{i,j} \in X_i} \gamma_k(x_{i,j}) \left[ \frac{(x_{i,j}^d - \mu_k^d)^2}{(\sigma_k^d)^3} - \frac{1}{\sigma_k^d} \right],$$

where  $\gamma_k(x_{i,j})$  is the soft assignment of  $x_{i,j}$  to  $k$ th Gaussian:

$$\gamma_k(x_{i,j}) = p(k|x_{i,j}, \lambda) = \frac{\pi_k p_k(x_{i,j}|\lambda)}{\sum_{l=1}^K \pi_l p_l(x_{i,j}|\lambda)},$$

The gradient vector is a concatenation of the partial derivatives with respect to all the parameters. To normalize the dynamic range of dimensions, diagonal of the Fisher information matrix  $F_\lambda$  is computed as:

$$F_\lambda = E_{X_i} [\nabla_\lambda \mathcal{L}(X_i|\lambda) \nabla_\lambda \mathcal{L}(X_i|\lambda)'],$$

and then applied to partial derivatives, resulting in the final definition of the Fisher vector:

$$FV(X_i) = \left( f_{\mu_k^d}^{-1/2} \frac{\partial \mathcal{L}(X_i|\lambda)}{\partial \mu_k^d}, f_{\sigma_k^d}^{-1/2} \frac{\partial \mathcal{L}(X_i|\lambda)}{\partial \sigma_k^d} \right)_{k=1..K},$$

where  $f_{\mu_k^d}$  and  $f_{\sigma_k^d}$  are the corresponding terms on the diagonal of  $F_\lambda$ .
