# Supplementary material for: Deep learning approach to describe and classify fungi microscopic images
Source: PubMed Central journal article supplement (PMC7326179; doi:10.1371/journal.pone.0234806), 2020-06-30
Supplement: pone.0234806.s003.pdf [file pone.0234806.s003.pdf]

S1 Table. The number of foreground patches overlapped by less than 50% for the images from S1 Fig.

| Strain | Image 1 | Image 2 | Image 3 | Image 4 | Image 5 | Image 6 | Image 7 | Image 8 | Image 9 | Image 10 | Total |
|--------|---------|---------|---------|---------|---------|---------|---------|---------|---------|----------|-------|
| CA     | 3       | 5       | 3       | 4       | 3       | 5       | 2       | 9       | 11      | 12       | 57    |
| CG     | 185     | 60      | 151     | 131     | 170     | 43      | 129     | 118     | 26      | 57       | 1070  |
| CL     | 8       | 18      | 26      | 10      | 4       | 19      | 9       | 3       | 14      | 30       | 111   |
| CN     | 4       | 3       | 2       | 3       | 11      | 3       | 4       | 1       | 4       | 4        | 35    |
| CP     | 67      | 92      | 36      | 39      | 109     | 29      | 53      | 38      | 161     | 83       | 707   |
| CT     | 39      | 3       | 5       | 113     | 58      | 41      | 8       | 30      | 17      | 17       | 331   |
| MF     | 4       | 6       | 3       | 5       | 1       | 4       | 2       | 2       | 4       | 6        | 37    |
| SB     | 55      | 191     | 102     | 45      | 60      | 61      | 33      | 79      | 9       | 204      | 839   |
| SC     | 27      | 5       | 7       | 11      | 22      | 4       | 5       | 8       | 9       | 9        | 107   |
