# Supplementary material for: Deep learning approach to describe and classify fungi microscopic images
Source: PubMed Central journal article supplement (PMC7326179; doi:10.1371/journal.pone.0234806), 2020-06-30
Supplement: pone.0234806.s004.pdf [file pone.0234806.s004.pdf]

S2 Table. The number of background patches overlapped by less than 50% for the images from S1 Fig.

| Strain | Image 1 | Image 2 | Image 3 | Image 4 | Image 5 | Image 6 | Image 7 | Image 8 | Image 9 | Image 10 | Total |
|--------|---------|---------|---------|---------|---------|---------|---------|---------|---------|----------|-------|
| CA     | 241     | 216     | 237     | 241     | 248     | 236     | 236     | 187     | 204     | 186      | 2232  |
| CG     | 14      | 79      | 0       | 52      | 14      | 9       | 28      | 0       | 43      | 70       | 309   |
| CL     | 174     | 66      | 109     | 88      | 144     | 92      | 142     | 156     | 88      | 57       | 1116  |
| CN     | 240     | 252     | 243     | 238     | 228     | 236     | 256     | 238     | 245     |          | 2176  |
| CP     | 48      | 43      | 68      | 32      | 5       | 104     | 9       | 41      | 3       | 9        | 362   |
| CT     | 83      | 183     | 98      | 9       | 44      | 46      | 103     | 52      | 117     | 79       | 814   |
| MF     | 230     | 135     | 198     | 196     | 226     | 211     | 212     | 181     | 194     | 147      | 1930  |
| SB     | 88      | 6       | 51      | 27      | 79      | 33      | 142     | 19      | 222     | 0        | 667   |
| SC     | 45      | 213     | 179     | 127     | 126     | 154     | 104     | 184     | 219     | 170      | 1521  |
