# Supplementary material for: Deep learning approach to describe and classify fungi microscopic images
Source: PubMed Central journal article supplement (PMC7326179; doi:10.1371/journal.pone.0234806), 2020-06-30
Supplement: pone.0234806.s005.pdf [file pone.0234806.s005.pdf]

S3 Table. The number of foreground patches overlapped by less than 50% for the images from S2 Fig.

| Strain | Image 1 | Image 2 | Image 3 | Image 4 | Image 5 | Image 6 | Image 7 | Image 8 | Image 9 | Image 10 | Total |
|--------|---------|---------|---------|---------|---------|---------|---------|---------|---------|----------|-------|
| CA     | 5       | 2       | 3       | 3       | 8       | 5       | 8       | 10      | 7       | 4        | 55    |
| CG     | 103     | 171     | 132     | 176     | 131     | 92      | 18      | 51      | 8       | 8        | 890   |
| CL     | 28      | 28      | 6       | 7       | 8       | 5       | 3       | 21      | 9       | 7        | 122   |
| CN     | 3       | 3       | 2       | 7       | 7       | 4       |         |         |         |          | 26    |
| CP     | 107     | 72      | 109     | 144     | 63      | 57      | 59      | 12      | 5       | 7        | 635   |
| CT     | 6       | 27      | 21      | 13      | 21      | 15      | 3       | 10      | 9       | 3        | 128   |
| MF     | 3       | 2       | 2       | 6       | 3       | 2       | 4       | 2       | 3       | 2        | 29    |
| SB     | 60      | 2       | 6       | 9       | 21      | 71      | 8       | 12      | 10      | 49       | 248   |
| SC     | 7       | 16      | 14      | 3       | 11      | 9       | 7       | 10      | 3       | 14       | 94    |
