# Supplementary material for: Deep learning approach to describe and classify fungi microscopic images
Source: PubMed Central journal article supplement (PMC7326179; doi:10.1371/journal.pone.0234806), 2020-06-30
Supplement: pone.0234806.s006.pdf [file pone.0234806.s006.pdf]

S4 Table. The number of background patches overlapped by less than 50% for the images from S2 Fig.

| Strain | Image 1 | Image 2 | Image 3 | Image 4 | Image 5 | Image 6 | Image 7 | Image 8 | Image 9 | Image 10 | Total |
|--------|---------|---------|---------|---------|---------|---------|---------|---------|---------|----------|-------|
| CA     | 215     | 229     | 228     | 224     | 235     | 204     | 203     | 204     | 227     | 202      | 2171  |
| CG     | 1       | 5       | 31      | 0       | 17      | 2       | 59      | 70      | 162     | 187      | 534   |
| CL     | 54      | 54      | 179     | 77      | 194     | 158     | 230     | 74      | 57      | 112      | 1189  |
| CN     | 241     | 252     | 253     | 220     | 243     | 243     |         |         |         |          | 1452  |
| CP     | 2       | 2       | 30      | 13      | 27      | 10      | 50      | 63      | 138     | 189      | 524   |
| CT     | 108     | 96      | 110     | 99      | 89      | 84      | 171     | 90      | 168     | 192      | 1207  |
| MF     | 158     | 227     | 225     | 166     | 204     | 185     | 179     | 186     | 171     | 189      | 1890  |
| SB     | 69      | 176     | 227     | 188     | 185     | 47      | 220     | 190     | 215     | 111      | 1628  |
| SC     | 144     | 122     | 111     | 188     | 131     | 176     | 248     | 190     | 174     | 195      | 1679  |
